# Supplementary material for: mTORC1-dependent TFEB nucleus translocation and pro-survival autophagy induced by zeolitic imidazolate framework-8
Source: Royal Society of Chemistry journal article supplement (doi:10.1039/d0bm00773k), 2020-01-01
Supplement: d0bm00773k1.pdf [file d0bm00773k1.pdf]

## Supporting Information

### **mTORC1-dependent TFEB nucleus translocation and pro-survival autophagy induced by zeolitic imidazolate framework-8**

*He Ding<sup>1,4</sup>, Yang Song<sup>1,3</sup>, Xiaowan Huang<sup>1</sup>, Liansheng Wang<sup>1</sup>, Shanzi Luo<sup>1</sup>, Hao Zhang<sup>1,3</sup>, Hao Pan<sup>1</sup>, Wenwei Jiang<sup>2</sup>, Jing Qian<sup>5</sup>, Guangyu Yao<sup>2\*</sup>, Long-ping Wen<sup>1,3,4\*</sup>, Yunjiao Zhang<sup>1,3,4\*</sup>*

<sup>1</sup> Department of Surgery, Guangzhou First People's Hospital, School of Medicine and Institutes for Life Sciences, South China University of Technology, Guangzhou 510006, China

<sup>2</sup> Breast Center, Nanfang Hospital, Southern Medical University, Guangzhou, Guangdong 510515, China.

<sup>3</sup> National Engineering Research Center for Tissue Restoration and Reconstruction, South China University of Technology, Guangzhou 510006, China

<sup>4</sup> Key Laboratory of Biomedical Engineering of Guangdong Province, and Innovation Center for Tissue Restoration and Reconstruction, South China University of Technology, Guangzhou 510006, China

<sup>5</sup> School of Environment and Energy Engineering, Anhui Jianzhu University, Hefei 23061, China

Corresponding Authors: Yunjiao Zhang, Longping Wen and Guangyu Yao

\*E-mail: zhangyunjiao@scut.edu.cn

\*E-mail: wenlp@scut.edu.cn

\*E-mail: ygy531@163.com

Notes

The authors declare no competing financial interest.

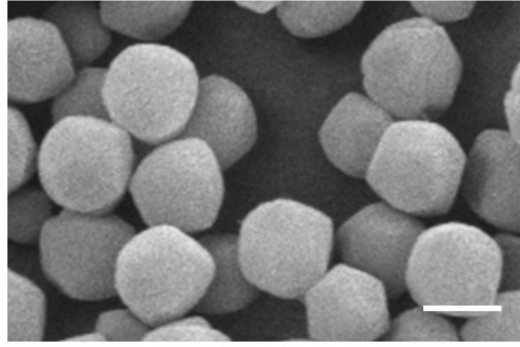

**Figure S1.** Scanning electron microscope (SEM) images of ZIF-8. Scale bar: 100 nm.

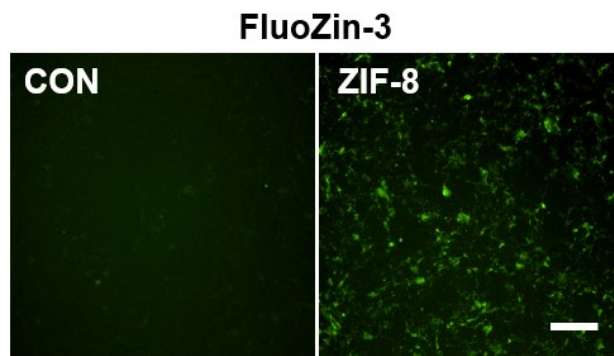

**Figure S2.** Representative images of  $Zn^{++}$  in HeLa cells stained by FluoZin-3 probe with treatments of PBS (CON) or ZIF-8 for 4h. Scale bar: 100 nm.

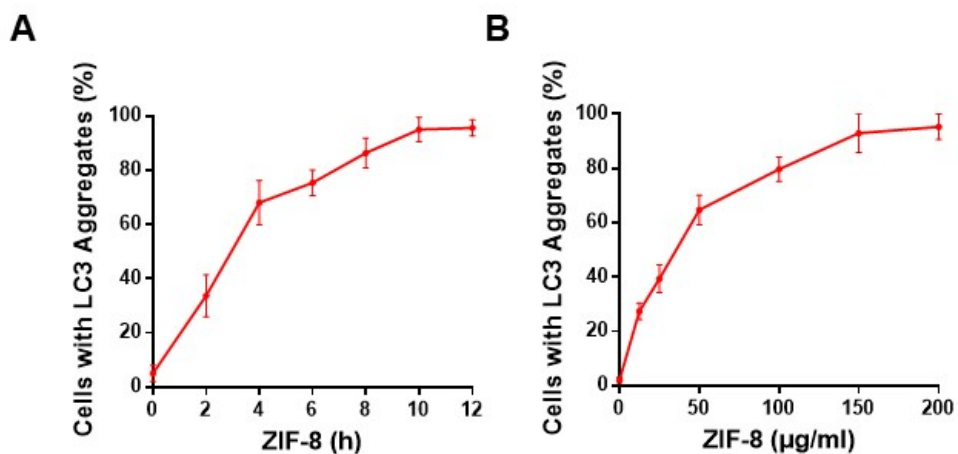

**Figure S3.** Statistical analysis of rates of GFP-LC3 dot aggregations after treatments in HeLa GFP-LC3 cells with  $100 \mu\text{g mL}^{-1}$  ZIF-8 in time course (A) or at various concentrations of ZIF-8 for 6 h (B).

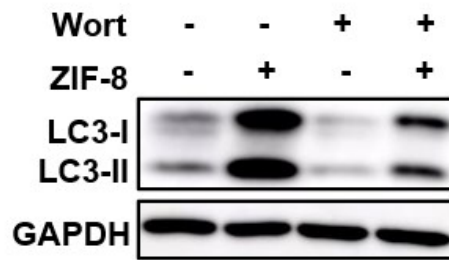

**Figure S4.** Western blotting analysis of LC3 after treatments with PBS or 100  $\mu\text{g mL}^{-1}$  ZIF-8 in HeLa cells for 10h with or without 1 mM wortmannin (Wort).

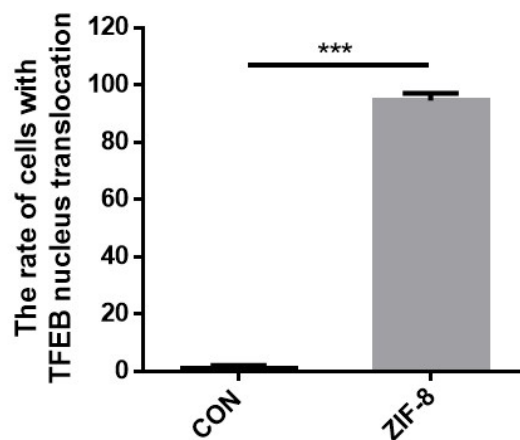

**Figure S5.** Statistical results of the rate of cells with TFEB nucleus translocation after PBS (CON) or ZIF-8 treatments for 6 h in HeLa TFEB cells, by counting at least 300 cells from fluorescent images.

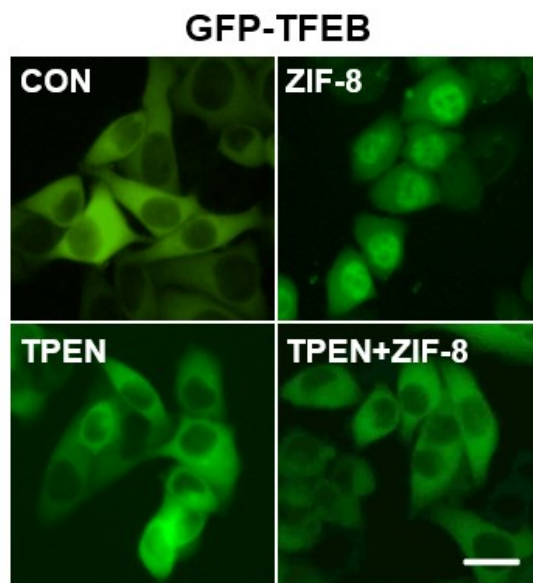

**Figure S6.** Representative fluorescence images after treating HeLa GFP-TFEB cells with PBS (CON) or 100 μg mL<sup>-1</sup> ZIF-8 for 6 h in the presence or absence of TPEN. Scale bar: 20 μm.

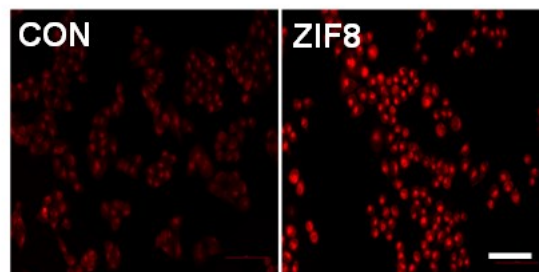

**Figure S7.** Representative fluorescent images after treating HeLa cells with PBS (CON) or 100 μg mL<sup>-1</sup> ZIF-8 for 10 h before dyeing lysosomes with 5 μM LysoTracker Red for 30 min. Scale bar: 100 μm.

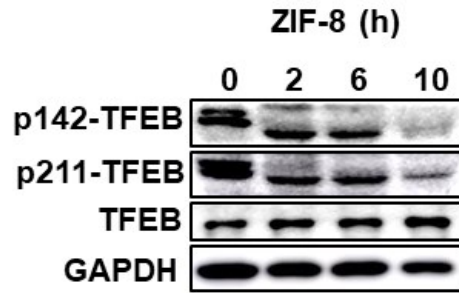

**Figure S8.** Western blotting test of phosphor-TFEB (Ser142), phosphor-TFEB (Ser211) and total TFEB in HeLa cells after treatments with 100 µg mL<sup>-1</sup> ZIF-8 for different time.

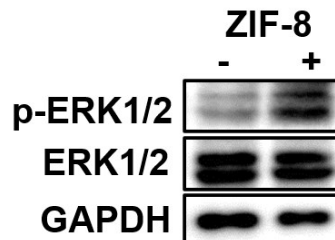

**Figure S9.** Western blotting analysis of phosphor -ERK 1/2 and total ERK 1/2 with or without ZIF-8 treatment at 100 µg mL<sup>-1</sup> for 4 h in HeLa cells.

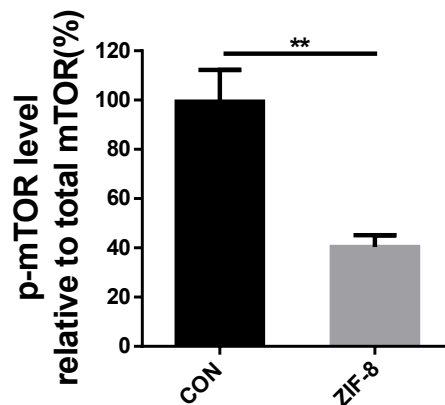

**Figure S10.** The level of phosphorylated mTOR (serine-2448) proteins relative to total mTOR proteins was quantified by statistical analysis basing on western blotting results with or without 100 µg mL<sup>-1</sup> ZIF-8 treatment for 4 h in HeLa cells.

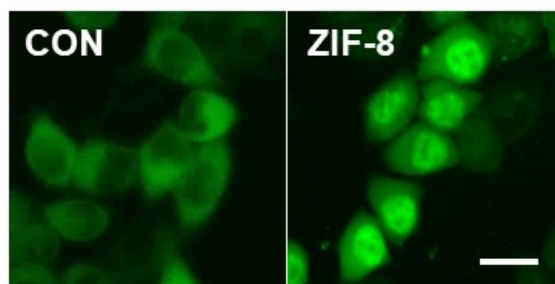

**Figure S11.** Representative images of GFP-TFEB in MCF-7 cells treatments with PBS (CON) or ZIF-8 for 6h. Scale bar: 20  $\mu$ m.

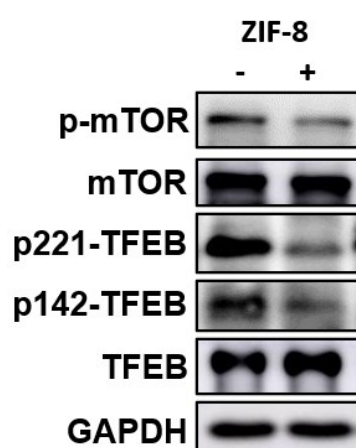

**Figure S12.** Western blotting analysis of MCF-7 with or without ZIF-8 treatment at 100  $\mu$ g mL<sup>-1</sup> for 4 h and tested the level of phosphor-mTOR (Ser2448), total mTOR, phosphor-TFEB (Ser142), phosphor-TFEB (Ser211) and total TFEB reprivately.

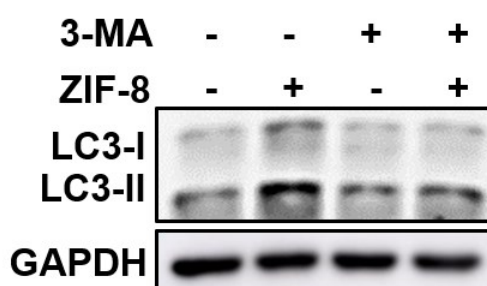

**Figure S13.** Western blotting analysis of the level of LC3 proteins in HeLa cells with treatments of PBS (CON) or 100  $\mu$ g mL<sup>-1</sup> ZIF-8 in the presence of 3-MA or not for 10 h.

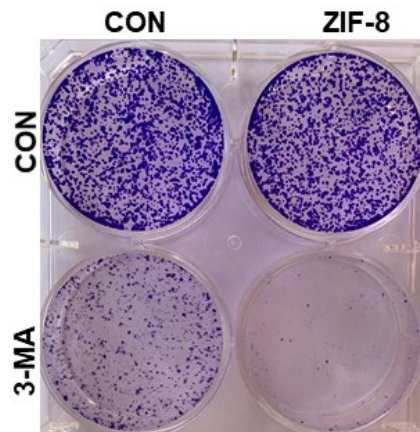

**Figure S14.** Clone formation of HeLa cells after treatments of PBS (CON) or 100  $\mu\text{g mL}^{-1}$  ZIF-8 with or without 3-MA for 24 h.

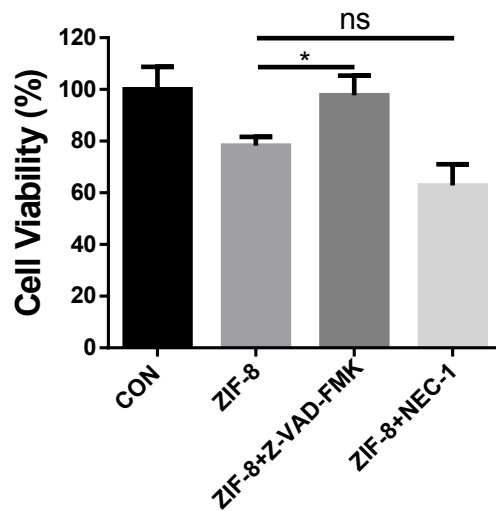

**Figure S15.** Cell viability of HeLa cells by MTT assay with treatments of PBS (CON), ZIF-8, ZIF-8+Z-VAD-FMK (selective apoptosis inhibitor), or ZIF-8+NEC-1 (specific necrosis inhibitor) for 10 h.

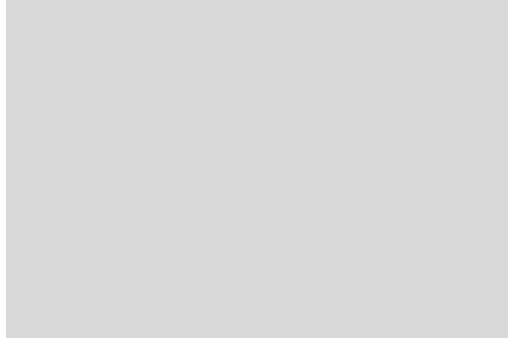

**Figure S16.** Western blotting of ATG5 and LC3 protein levels after transfecting negative control si-RNA (si-NC) or ATG5 si-RNA (si-ATG5) to HeLa cells for 36 h following PBS or ZIF-8 treatment.

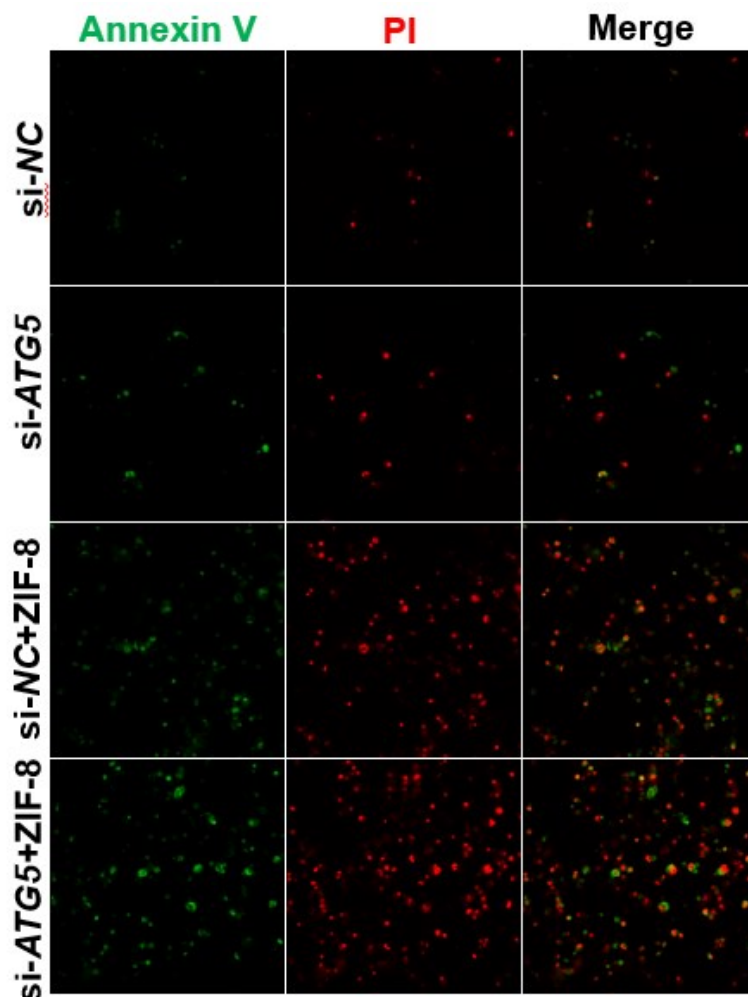

**Figure S17.** Cell viability of HeLa cells staining by Annexin-V/PI with  $100 \mu\text{g mL}^{-1}$  ZIF-8 for 10 h or not following knockdown assay with negative control siRNA (si-NC) or ATG5 si-RNA (si-ATG5) for 36 h.



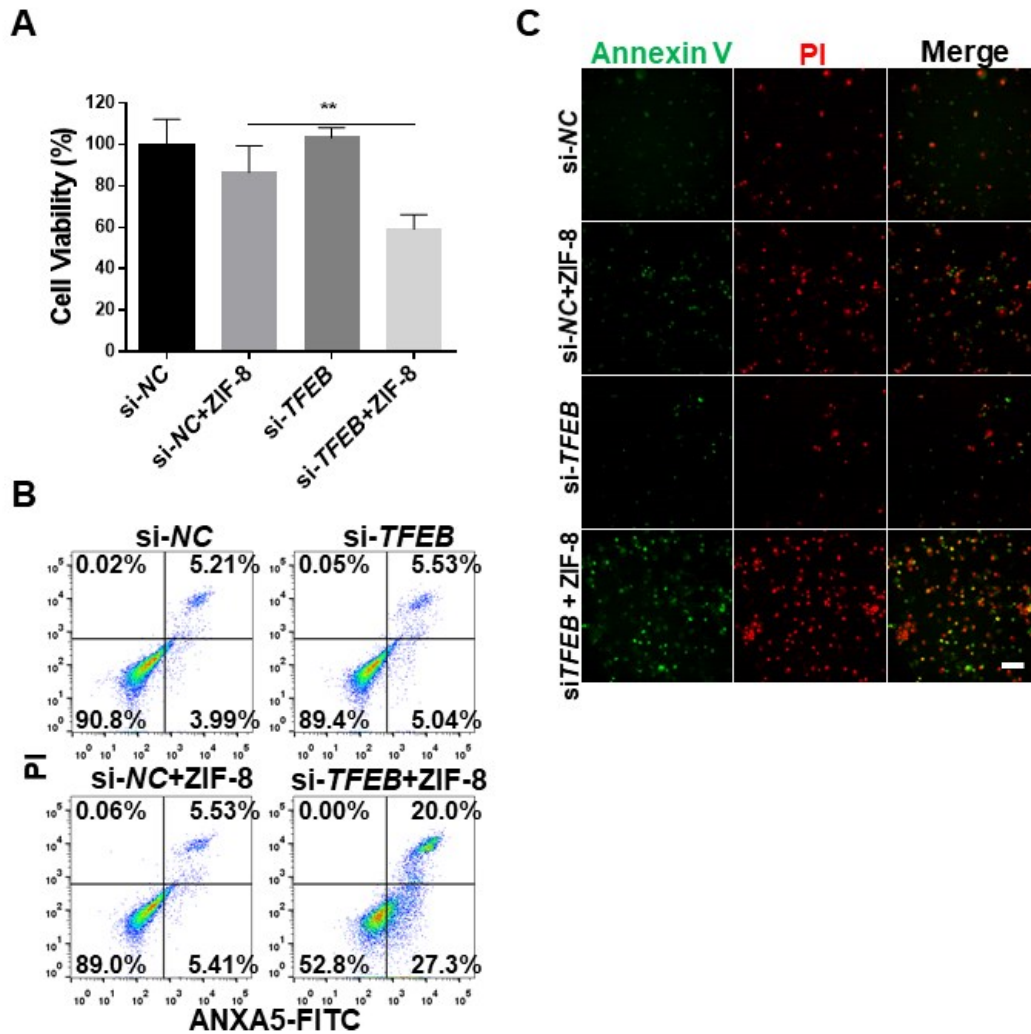

**Figure S18.** (A) Cell viability by MTT assay after treating HeLa cells with or without  $100 \mu\text{g mL}^{-1}$  ZIF-8 for 10 h following transfection with negative control si-RNA (si-NC) or *TFEB* si-RNA (si-*TFEB*) for 36h. (B, C) Flow cytometry analysis (B) and representative fluorescent images (C) of HeLa cells stained by Annexin-V/PI for 15 min after treatments of PBS (CON) or  $100 \mu\text{g mL}^{-1}$  ZIF-8 for 10 h, in the condition of transfecting negative control si-RNA (si-NC) or *TFEB* si-RNA (si-*TFEB*) for 36h. Scale bar:  $100\mu\text{m}$ .

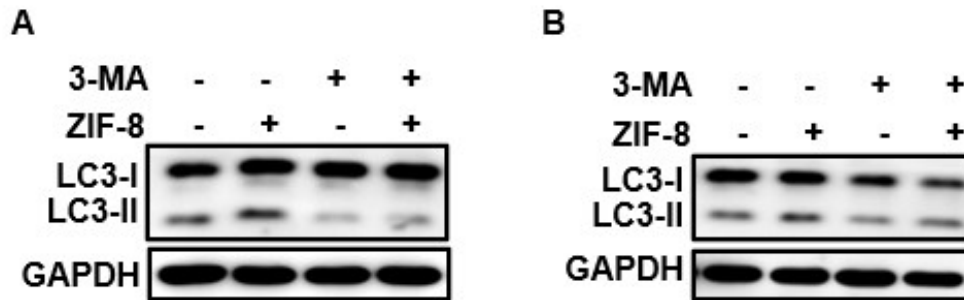

**Figure S19.** Western blotting analysis of the level of LC3 proteins in MCF-7 cells (A) and NCI-H1299 cells (B) with treatments of PBS (CON) or  $50 \mu\text{g mL}^{-1}$  ZIF-8 in the presence of 3-MA or not for 12 h.

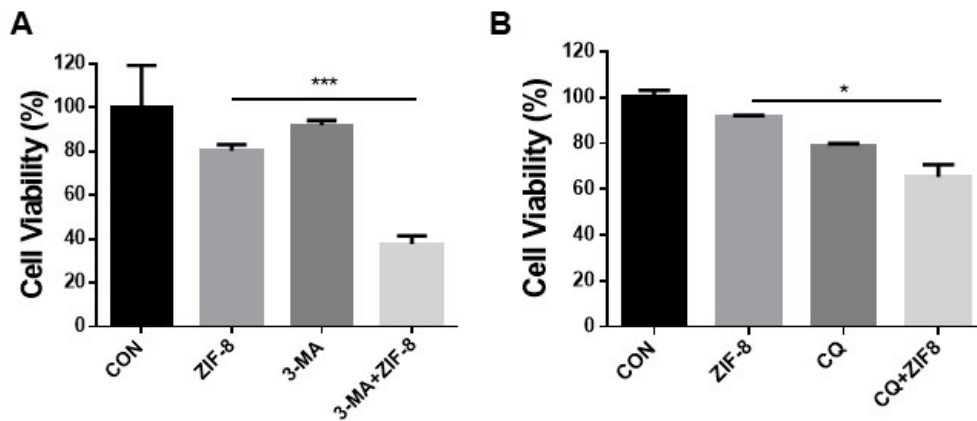

**Figure S20.** Cell viability of MCF-7 cells (A) or H1299 cells (B) by MTT assay after treating HeLa cells with or without  $50 \mu\text{g mL}^{-1}$  ZIF-8 and autophagy inhibitors (3-MA, or CQ) for 24 h.

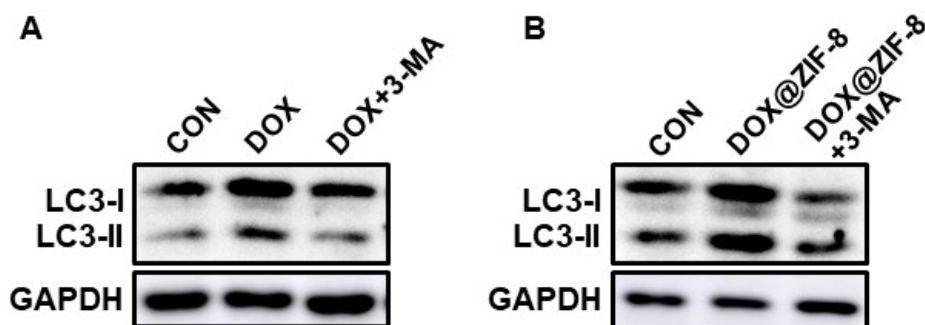

**Figure S21.** Western blotting analysis of the level of LC3 proteins in HeLa cells with treatments of PBS (CON),  $1 \mu\text{g mg}^{-1}$  DOX or DOX+3-MA for 24 h (A) and PBS (CON), DOX@ZIF-8 or DOX@ZIF-8 +3-MA for 24 h.

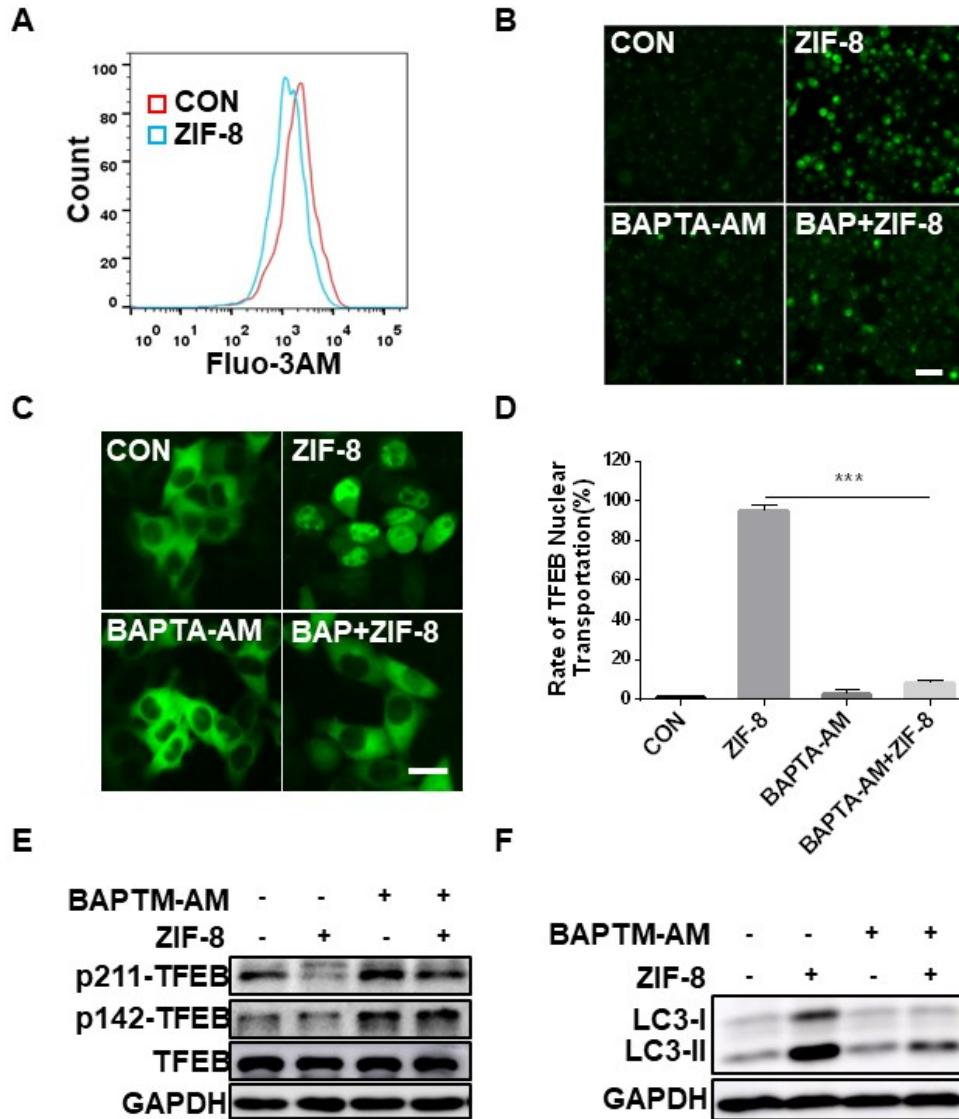

**Figure S22.**  $\text{Ca}^{2+}$  mobilization may play an important role in ZIF-8 induced TFEB activation. (A, B) Intracellular calcium detected by Fluo-3AM probe with PBS (CON) or  $100 \mu\text{g mL}^{-1}$  ZIF-8 treatment by flow cytometry (A) and fluorescence images (B). BAPTA-AM:  $10 \mu\text{M}$ . Scale bar:  $50 \mu\text{m}$ . (C, D) Representative images (C) of HeLa EGFP-TFEB with PBS (CON) or  $100 \mu\text{g mL}^{-1}$  ZIF-8 treatments for 6 h together with  $10 \mu\text{M}$  BAPTA-AM or not. Scale bar:  $20 \mu\text{m}$ . Quantified data in D was obtained by counting at least 300 cells each group. (E) Western blotting analysis of phosphor-TFEB (Ser142), phosphor-TFEB (Ser211) and total TFEB after treatments with PBS or  $100 \mu\text{g mL}^{-1}$  ZIF-8, in the presence or absence of  $10 \mu\text{M}$  BAPTA-AM for 6 h in HeLa EGFP-TFEB cells. (F) Western blotting analysis of LC3 after treatments with PBS or  $100 \mu\text{g mL}^{-1}$  ZIF-8 for 10 h, with or without  $10 \mu\text{M}$  BAPTA-AM in HeLa cells.

**Table S1. RT-PCR Primer Sequences.**

| <b>Gene Name</b> | <b>Forward primer sequence (5'-3')</b> | <b>Reverse primer sequence (5'-3')</b> |
|------------------|----------------------------------------|----------------------------------------|
| <b>MAPLC3B</b>   | <b>GAGAAGCAGCTTCCTGTTCTGG</b>          | <b>GTGTCCGTTACCAACAGGAAG</b>           |
| <b>SQSTM1</b>    | <b>GCACCCCAATGTGATCTGC</b>             | <b>CGCTACACAAGTCGTAGTCTGG</b>          |
| <b>LAMP1</b>     | <b>ACGTTACAGCGTCCAGCTCAT</b>           | <b>TCTTTGGAGCTCGCATTGG</b>             |
| <b>CTSB</b>      | <b>AGTGGAGAATGGCACACCCTACTS<br/>D</b>  | <b>AAGAAGCCATTGTCACCCCA</b>            |
| <b>CTSD</b>      | <b>AACTGCTGGACATCGCTTGCT</b>           | <b>CATTCTTCACGTAGGTGCTGGA</b>          |
| <b>ATP6V1H</b>   | <b>GGAAGTGTCAGATGATCCCA</b>            | <b>CCGTTTGCCTCGTGGATAAT</b>            |
| <b>VPS11</b>     | <b>CAAGCCTACAACTACGGGTG</b>            | <b>GAGTGCAGAGTGGATTGCCA</b>            |
| <b>VPS18</b>     | <b>CAAGGCAAATGAGCCCAACC</b>            | <b>GCTAGTGGCCGTACCTTCTG</b>            |
| <b>ACTB</b>      | <b>GATCATTGCTCCTCCTGAGC</b>            | <b>ACTCCTGCTTGCTGATCCAC</b>            |
